# Supplementary material
Source: Springer Nature journal article supplement (https://www.springermedizin.de/resource/supplementary/12874_2014_1165_MOESM2_ESM.pdf/9433432)
Supplement: MOESM2 [file 9433432]

**Bayes factor**

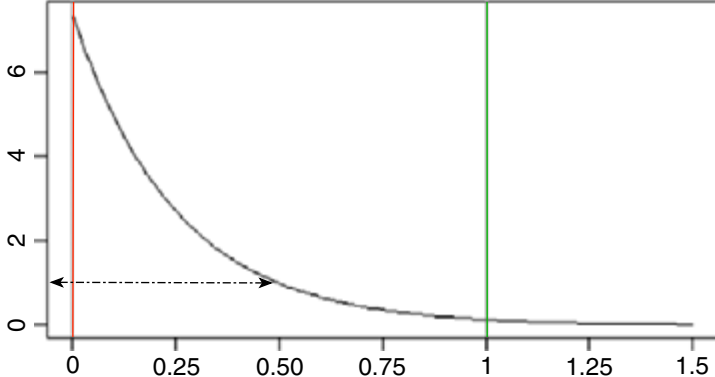

**Observed effect size**  
(null hypothesis is marked in red and the alternative hypothesis is marked in green)
